# Supplementary material for: Quality of Life and Health Status among those receiving Renal Replacement Therapy in Trinidad and Tobago. West Indies.
Source: Research Square preprint supplement (doi:10.21203/rs.3.rs-19194/v2), 2021-01-26
Supplement: Supplementary file 1 [file 7e9af1c610436deca7d6b4d0.docx]

Additional file 2, Supplementary figure 1: Percentage of patients and population norms by gender and age reporting any problems using EuroQol

**Key**

TR-Transplant PD-Peritoneal Dialysis HD-Haemodialysis
